# Supplementary material
Source: PubMed Central journal article supplement (PMC8370329)
Supplement: Supp_Fig1.pdf [file Supp_Fig1.pdf]

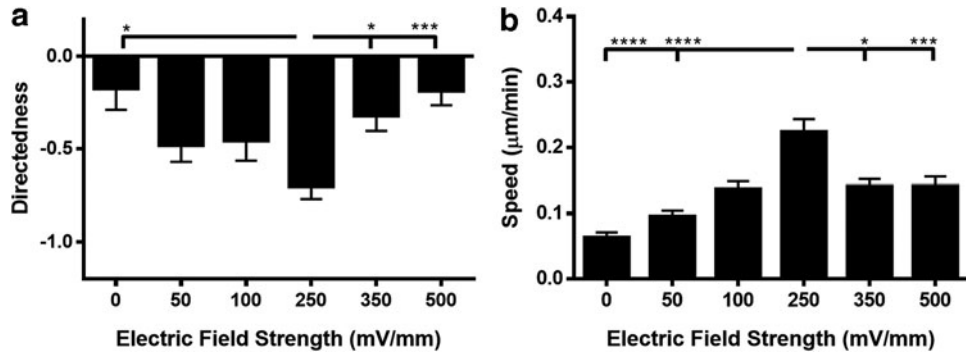

**SUPPLEMENTARY FIG. S1.** Optimization of EF strength required for galvanotaxis of human drNPCs ( $n \geq 3$  independent experiments,  $n \geq 44$  cells per condition). Group means were compared by using Kruskal–Wallis test followed by Dunn’s correction for multiple pairwise comparisons. Data are represented as means  $\pm$  SEM. \* $p < 0.05$ , \*\*\* $p < 0.005$ , \*\*\*\* $p < 0.0001$ . EF, electric field; drNPC, directly reprogrammed neural precursor cell.
