# Supplementary material
Source: PubMed Central journal article supplement (PMC8370329)
Supplement: Supp_Fig2.pdf [file Supp_Fig2.pdf]

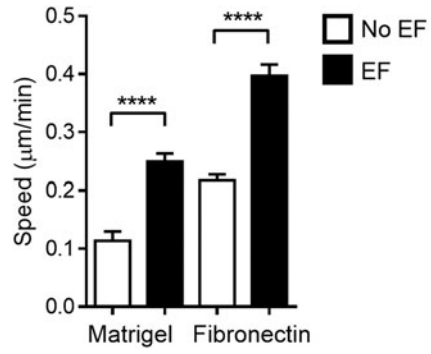

**SUPPLEMENTARY FIG. S2.** Average drNPC migration speed in the presence and absence of an EF on matrigel and fibronectin substrates analyzed at 20-min intervals. Each bar represents  $\geq 45$  cells from  $\geq 3$  independent experiments. Data are represented as means  $\pm$  S.E.M. \*\*\*\* $p < 0.0001$ .
