# Supplementary material
Source: PubMed Central journal article supplement (PMC8370329)
Supplement: Supp_Fig3.pdf [file Supp_Fig3.pdf]

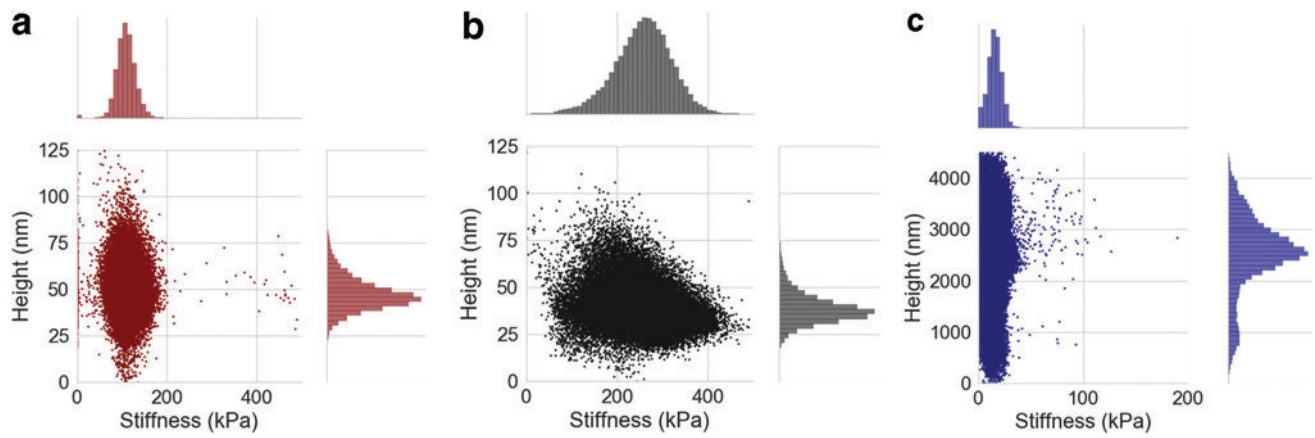

**SUPPLEMENTARY FIG. S3.** Analysis of fibronectin and matrigel substrates and height versus stiffness scatterplots. (a–c) Representative height versus stiffness scatterplots for complete coating of (a) matrigel, (b) fibronectin, and (c) cluster of cell bodies of cell monolayer.
